# Supplementary material for: Early azathioprine in acute Vogt-Koyanagi-Harada disease: a prospective 24-month follow-up study with multimodal imaging and electroretinogram
Source: Research Square preprint supplement (doi:10.21203/rs.3.rs-1251714/v1), 2022-01-13
Supplement: Supplementary file 1 [file 72a4ca2820bc215f6a5d4aa3.docx]

**Supplemental Table 1 –** Example of oral prednisone taper schedule on a patient with 60kg with Vogt-Koyanagi-Harada disease followed from acute onset

| Prednisone dosage (mg/day) | mg/kg | Duration (weeks) |
| --- | --- | --- |
| 60 | 1 | 3-4 |
| 50 | 0.83 | 3-4 |
| 40 | 0.67 | 3-4 |
| 30 | 0.5 | 2 |
| 20 | 0.33 | 2 |
| 15 | 0.25 | 2 |
| 10 | 0.16 | 4 |
| 7.5 | 0.125 | 4 |
| 5 | 0.08 | 4 |
| 2.5 | 0.04 | 4 |
| 0 |  |  |
