# Supplementary material for: Early azathioprine in acute Vogt-Koyanagi-Harada disease: a prospective 24-month follow-up study with multimodal imaging and electroretinogram
Source: Research Square preprint supplement (doi:10.21203/rs.3.rs-1251714/v1), 2022-01-13
Supplement: Supplementary file 2 [file b44d809dee18c4334c334a89.docx]

**Supplemental Table 2** – Full-field electroretinogram results at 1, 12 and 24 months (median value) and full-field electroretinogram-based groups of 15 patients with Vogt-Koyanagi-Harada disease followed from acute onset

| **Parameters a** | | **ERG-based stable group (n = 20 eyes) b** | | | | | | | | | | | |  | | **ERG-based worsening group (n = 10 eyes) b** | | | | | | | | | | | |  | | **Stable x Worsening** | | | | | |
| --- | --- | --- | --- | --- | --- | --- | --- | --- | --- | --- | --- | --- | --- | --- | --- | --- | --- | --- | --- | --- | --- | --- | --- | --- | --- | --- | --- | --- | --- | --- | --- | --- | --- | --- | --- |
| **M1** | | **M12** | | **M24** | | ***M1x M12 c*** | | ***M1x M24 d*** | | ***M12xM24 e*** | |  | | **M1** | | **M12** | | **M24** | | ***M1x M12 f*** | | ***M1x M24 g*** | | ***M12xM24 h*** | |  | | **M1 *i*** | | **M12 *j*** | | **M24 *k*** |
| **Scotopic** |  | |  | |  | |  | |  | |  | |  | |  | |  | |  | |  | |  | |  | |  | |  | |  | |  | |
| **b wave implicit time (ms)** | | 95.9  (81.9-106) | | 96  (85.1-112.4) | | 93.8  (79.5-108.3) | | >0.999 | | >0.999 | | 0.164 | |  | | 89.2  (82.2-96.9) | | 96.6  (87.8-100.7) | | 90.4  (82.5-103.3) | | 0.494 | | >0.999 | | >0.999 | |  | | 0.582 | | >0.999 | | >0.999 | |
| **amplitude (μV)** | | 89.7  (1.3-343) | | 233.2  (111.8-286.2) | | 207.8  (125.4-261.9) | | **<0.001** | | **<0.001** | | >0.999 | |  | | 45  (28.7-295.3) | | 181.9  (132-280.7) | | 146  (88.5-218.3) | | **<0.001** | | 0.100 | | 0.907 | |  | | >0.999 | | >0.999 | | >0.999 | |
| **Maximum scotopic** | |  | |  | |  | |  | |  | |  | |  | |  | |  | |  | |  | |  | |  | |  | |  | |  | |  | |
| **a wave implicit time (ms)** | | 24.1  (22.6-28.2) | | 23.8  (22.3-24.7) | | 23.2  (21.7-25) | | **<0.001** | | **<0.001** | | 0.398 | |  | | 24.9  (22.3-26.1) | | 23.5  (21.7-24.4) | | 23.1  (21.4-24.1) | | **0.004** | | **<0.001** | | >0.999 | |  | | >0.999 | | >0.999 | | >0.999 | |
| **amplitude (μV)** | | 177  (43.2-419) | | 235  (123.5-372.3) | | 228.9  (131.2-325.1) | | >0.999 | | 0.543 | | >0.999 | |  | | 161.5  (66.7-238) | | 219.9  (89.4-265.2) | | 204.1  (85.4-273.6) | | 0.809 | | >0.999 | | >0.999 | |  | | >0.999 | | >0.999 | | >0.999 | |
| **b wave implicit time (ms)** | | 53.1  (48.7-61.9) | | 51.6  (49.6-58.7) | | 51.1  (47.6-55.8) | | 0.128 | | **<0.001** | | >0.999 | |  | | 58.7  (50.8-60.5) | | 48.6  (46.7-57.5) | | 48.4  (46.4-52.8) | | **<0.001** | | **<0.001** | | >0.999 | |  | | 0.911 | | 0.233 | | 0.565 | |
| **amplitude (μV)** | | 369.5  (187.6-798) | | 511.5  (344.4-790.1) | | 517.3  (367.6-616.9) | | **0.001** | | **0.006** | | >0.999 | |  | | 282.9  (156-570.4) | | 478  (313-632.4) | | 431  (276.2-579.4) | | **0.002** | | 0.129 | | >0.999 | |  | | >0.999 | | >0.999 | | >0.999 | |
| **Oscillatory potential (μV)** | | 77.9  (23.5-302.1) | | 150.5  (64.6-288.4) | | 143.9  (91.7-272.1) | | **0.004** | | **0.002** | | >0.999 | |  | | 64.4  (36-174.8) | | 106.3  (58.3-205.1) | | 74  (60.1-171.8) | | 0.895 | | >0.999 | | >0.999 | |  | | >0.999 | | >0.999 | | >0.999 | |
| **Photopic** | |  | |  | |  | |  | |  | |  | |  | |  | |  | |  | |  | |  | |  | |  | |  | |  | |  | |
| **a wave implicit time (ms)** | | 16.9  (15.9-19.1) | | 16.4  (15.3-17.6) | | 16.1  (14.7-17.6) | | **0.007** | | **0.002** | | >0.999 | |  | | 17.3  (15.3-20.3) | | 16.6  (14.1-17.3) | | 16.6  (14.4-17.9) | | 0.057 | | 0.164 | | >0.999 | |  | | >0.999 | | >0.999 | | >0.999 | |
| **amplitude (μV)** | | 32.8  (14.7-67.7) | | 40.9  (24.2-50.8) | | 40.5  (26.6-59) | | >0.999 | | 0.154 | | >0.999 | |  | | 35  (16.5-45.9) | | 32.9  (21.1-58.5) | | 37.6  (13.1-68.7) | | >0.999 | | >0.999 | | >0.999 | |  | | >0.999 | | >0.999 | | >0.999 | |
| **b wave implicit time (ms)** | | 33.7  (28.5-39.6) | | 31.6  (29.1-34.3) | | 31.7  (28.2-33.5) | | **<0.001** | | **<0.001** | | >0.999 | |  | | 33.8  (30.2-36.7) | | 31.3  (29.4-34.9) | | 31.3  (29.1-33.8) | | **0.002** | | **<0.001** | | >0.999 | |  | | >0.999 | | >0.999 | | >0.999 | |
| **amplitude (μV)** | | 147.5  (28.3-315) | | 165.8  (114-300) | | 163.6  (109.3-298.5) | | 0.438 | | 0.370 | | >0.999 | |  | | 141.5  (55.2-228) | | 142.9  (77.9-273.4) | | 164.3  (58-287.2) | | >0.999 | | >0.999 | | >0.999 | |  | | >0.999 | | >0.999 | | >0.999 | |
| **Flicker 30 Hz** | | 36.1  (14-102) | | 44.5  (31.9-86.6) | | 45.1  (32.8-90.3) | | 0.248 | | 0.059 | | >0.999 | |  | | 36.9  (19.7-58.7) | | 44.9  (21.8-62.1) | | 48.1  (12.2-64.9) | | >0.999 | | >0.999 | | >0.999 | |  | | >0.999 | | >0.999 | | >0.999 | |

ERG: electroretinogram; a ERG measures represented as median; b eyes were grouped based on worsening (a value reduction of ≥31% of any amplitude and/or ≥44% of 30Hz flicker) or stabilization of the scotopic ffERG parameters between M12 and M24; c*p* value comparing stable group at month 1 (M1) x at month 12 (M12); d*p* value comparing stable group at month 1 (M1) x at month 24 (M24); e*p* value comparing stable group at month 12 (M12) x at month 24 (M24); f*p* value comparing worsening group at month 1 (M1) x at month 12 (M12); g*p* value comparing worsening group at month 1 (M1) x at month 24 (M24); h*p* value comparing worsening group at month 12 (M12) x at month 24 (M24); i*p* value comparing stable group x worsening group at month 1 (M1); j*p* value comparing stable group x worsening group at month 12 (M12); k*p* value comparing stable group x worsening group at month 24 (M24). Generalized estimated equations with normal distribution and identity link function, supposing an exchangeable correlation matrix between the eye and moments followed by Bonferroni test for multiple comparisons
