# Supplementary material for: Early azathioprine in acute Vogt-Koyanagi-Harada disease: a prospective 24-month follow-up study with multimodal imaging and electroretinogram
Source: Research Square preprint supplement (doi:10.21203/rs.3.rs-1251714/v1), 2022-01-13
Supplement: Supplementary file 3 [file f2340cde5a4e52e694b22da6.docx]

**Supplemental File**

Brazilian Vogt-Koyanagi-Harada disease study group

| Name of investigator | Study site |
| --- | --- |
| Carlos Eduardo Hirata | HCFMUSP, Faculdade de Medicina, Universidade de São Paulo, SP, Brazil |
| Celso Morita | HCFMUSP, Faculdade de Medicina, Universidade de São Paulo, SP, Brazil |
| Cintia Kanenobu | HCFMUSP, Faculdade de Medicina, Universidade de São Paulo, SP, Brazil |
| Fernanda Maria Silveira Souto | HCFMUSP, Faculdade de Medicina, Universidade de São Paulo, SP, Brazil |
| Joyce Hisae Yamamoto | HCFMUSP, Faculdade de Medicina, Universidade de São Paulo, SP, Brazil |
| Marcelo Mendes Lavezzo | HCFMUSP, Faculdade de Medicina, Universidade de São Paulo, SP, Brazil |
| Maria Kiyoko Oyamada | HCFMUSP, Faculdade de Medicina, Universidade de São Paulo, SP, Brazil |
| Priscilla Figueiredo Campos da Nóbrega | HCFMUSP, Faculdade de Medicina, Universidade de São Paulo, SP, Brazil |
| Ruy Felippe Brito Gonçalves Missaka | HCFMUSP, Faculdade de Medicina, Universidade de São Paulo, SP, Brazil |
| Smairah Frutuoso Abdallah | HCFMUSP, Faculdade de Medicina, Universidade de São Paulo, SP, Brazil |
| Viviane Mayumi Sakata | Faculdade de Medicina, Universidade Federal do Paraná, PR, Brazil |
